# Supplementary material for: Dielectric relaxation behavior in antiferroelectric metal organic framework [(CH3)2NH2][FeIIIFeII(HCOO)6] single crystals
Source: Royal Society of Chemistry journal article supplement (doi:10.1039/c6cp00064a), 2016-01-01
Supplement: c6cp00064a1.pdf [file c6cp00064a1.pdf]

Table 1. Experimental details

For all structures:  $C_8H_{14}Fe_2NO_{12}$ ,  $M_r = 427.91$ . Experiments were carried out with Mo  $K\alpha$  radiation using a Xcalibur, Atlas. H-atom parameters were constrained. Absorption correction: Multi-scan *CrysAlis PRO* 1.171.38.41 (Rigaku Oxford Diffraction, 2015) Empirical absorption correction using spherical harmonics, implemented in SCALE3 ABSPACK scaling algorithm. Computer programs: *CrysAlis PRO* 1.171.38.41 (Rigaku OD, 2015), *CrysAlis PRO* 1.171.38.34a (Rigaku OD, 2015), *SHELXL2014/7* (Sheldrick, 2014).

| <b>Crystal data</b>                                                                                                        |                              |                              |                              |                              |                            |
|----------------------------------------------------------------------------------------------------------------------------|------------------------------|------------------------------|------------------------------|------------------------------|----------------------------|
| Crystal system,<br>space group                                                                                             | Trigonal, <i>R-3c:H</i>      | Trigonal, <i>R-3c:H</i>      | Trigonal, <i>R-3c:H</i>      | Trigonal, <i>R-3c:H</i>      | Trigonal, <i>P-31c</i>     |
| Temperature (K)                                                                                                            | 100                          | 125                          | 140                          | 150                          | 160                        |
| <i>a</i> , <i>c</i> (Å)                                                                                                    | 14.2916 (5),<br>41.4795 (17) | 14.2896 (5),<br>41.4830 (15) | 14.2909 (5),<br>41.5072 (16) | 14.2991 (5),<br>41.5361 (13) | 8.2603 (3),<br>13.8466 (4) |
| <i>V</i> (Å <sup>3</sup> )                                                                                                 | 7337.1 (6)                   | 7335.7 (6)                   | 7341.3 (6)                   | 7354.9 (5)                   | 818.20 (6)                 |
| <i>Z</i>                                                                                                                   | 18                           | 18                           | 18                           | 18                           | 2                          |
| $\mu$ (mm <sup>-1</sup> )                                                                                                  | 1.84                         | 1.84                         | 1.84                         | 1.83                         | 1.83                       |
| Crystal size (mm)                                                                                                          | 0.20 × 0.08 ×<br>0.06        | 0.20 × 0.08 ×<br>0.06        | 0.20 × 0.08 ×<br>0.06        | 0.26 × 0.20 ×<br>0.06        | 0.20 × 0.08 ×<br>0.06      |
| <b>Data collection</b>                                                                                                     |                              |                              |                              |                              |                            |
| <i>T</i> <sub>min</sub> , <i>T</i> <sub>max</sub>                                                                          | 0.902, 1.000                 | 0.896, 1.000                 | 0.901, 1.000                 | 0.904, 1.000                 | 0.889, 1.000               |
| No. of measured,<br>independent and<br>observed [ <i>I</i> ><br>2 $\sigma$ ( <i>I</i> )] ref.                              | 15149, 1558,<br>1297         | 15140, 1556,<br>1269         | 15136, 1558,<br>1262         | 15169, 1561,<br>1216         | 5752, 723, 641             |
| <i>R</i> <sub>int</sub>                                                                                                    | 0.031                        | 0.031                        | 0.031                        | 0.029                        | 0.022                      |
| ( <i>sin</i> $\theta$ / $\lambda$ ) <sub>max</sub> (Å <sup>-1</sup> )                                                      | 0.610                        | 0.610                        | 0.610                        | 0.610                        | 0.691                      |
| <b>Refinement</b>                                                                                                          |                              |                              |                              |                              |                            |
| <i>R</i> [ <i>F</i> <sup>2</sup> > 2 $\sigma$ ( <i>F</i> <sup>2</sup> )],<br><i>wR</i> ( <i>F</i> <sup>2</sup> ), <i>S</i> | 0.025, 0.070,<br>0.98        | 0.025, 0.072,<br>0.99        | 0.026, 0.069,<br>1.10        | 0.030, 0.078,<br>1.17        | 0.022, 0.050,<br>1.04      |
| No. of reflections                                                                                                         | 1558                         | 1556                         | 1558                         | 1561                         | 723                        |
| No. of parameters                                                                                                          | 113                          | 113                          | 113                          | 113                          | 40                         |
| No. of restraints                                                                                                          | 3                            | 3                            | 3                            | 3                            | 2                          |
| $\Delta$ <sub>max</sub> , $\Delta$ <sub>min</sub> (e Å <sup>-3</sup> )                                                     | 0.24, -0.34                  | 0.22, -0.35                  | 0.25, -0.39                  | 0.41, -0.50                  | 0.26, -0.28                |

Table 2. Selected geometric parameters (Å)

|                        | (100K)      | (125K)      | (140K)      | (150K)      |                         | (160K)      |
|------------------------|-------------|-------------|-------------|-------------|-------------------------|-------------|
| Fe1—O4 <sup>i</sup>    | 2.0919 (12) | 2.0895 (12) | 2.0934 (12) | 2.0955 (14) | Fe1—O1 <sup>xi</sup>    | 2.1205 (10) |
| Fe1—O4                 | 2.0920 (12) | 2.0896 (12) | 2.0934 (12) | 2.0955 (14) | Fe1—O1 <sup>xii</sup>   | 2.1205 (10) |
| Fe1—O2 <sup>i</sup>    | 2.1315 (12) | 2.1309 (12) | 2.1302 (12) | 2.1304 (14) | Fe1—O1 <sup>xiii</sup>  | 2.1205 (10) |
| Fe1—O2                 | 2.1315 (12) | 2.1310 (12) | 2.1302 (12) | 2.1306 (14) | Fe1—O1                  | 2.1205 (10) |
| Fe1—O1 <sup>i</sup>    | 2.1431 (11) | 2.1431 (12) | 2.1411 (12) | 2.1391 (13) | Fe1—O1 <sup>xiv</sup>   | 2.1205 (10) |
| Fe1—O1                 | 2.1432 (11) | 2.1431 (12) | 2.1412 (12) | 2.1391 (13) | Fe1—O1 <sup>xv</sup>    | 2.1205 (10) |
| Fe2—O6 <sup>ii</sup>   | 2.0076 (11) | 2.0069 (11) | 2.0045 (11) | 2.0069 (12) | Fe2—O2 <sup>xvi</sup>   | 2.0061 (9)  |
| Fe2—O6 <sup>iii</sup>  | 2.0076 (11) | 2.0069 (11) | 2.0046 (11) | 2.0069 (12) | Fe2—O2                  | 2.0061 (9)  |
| Fe2—O6                 | 2.0076 (11) | 2.0069 (11) | 2.0046 (11) | 2.0069 (12) | Fe2—O2 <sup>xvii</sup>  | 2.0062 (9)  |
| Fe2—O6 <sup>iv</sup>   | 2.0077 (11) | 2.0069 (11) | 2.0046 (11) | 2.0069 (12) | Fe2—O2 <sup>xviii</sup> | 2.0062 (9)  |
| Fe2—O6 <sup>v</sup>    | 2.0077 (11) | 2.0069 (11) | 2.0046 (11) | 2.0069 (12) | Fe2—O2 <sup>xix</sup>   | 2.0062 (9)  |
| Fe2—O6 <sup>vi</sup>   | 2.0077 (11) | 2.0069 (11) | 2.0046 (11) | 2.0070 (12) | Fe2—O2 <sup>xx</sup>    | 2.0062 (9)  |
| Fe3—O3 <sup>vii</sup>  | 1.9974 (11) | 1.9960 (11) | 1.9970 (11) | 1.9994 (13) | O1—C1                   | 1.2349 (17) |
| Fe3—O3 <sup>viii</sup> | 1.9974 (11) | 1.9960 (11) | 1.9970 (11) | 1.9994 (13) | O2—C1                   | 1.2615 (17) |
| Fe3—O3                 | 1.9974 (11) | 1.9960 (11) | 1.9970 (11) | 1.9994 (13) | C2—N1                   | 1.473 (8)   |
| Fe3—O5                 | 2.0199 (11) | 2.0185 (11) | 2.0156 (11) | 2.0162 (13) | C21—N1                  | 1.445 (8)   |
| Fe3—O5 <sup>viii</sup> | 2.0200 (11) | 2.0186 (11) | 2.0156 (11) | 2.0162 (13) |                         |             |
| Fe3—O5 <sup>vii</sup>  | 2.0200 (11) | 2.0186 (11) | 2.0156 (11) | 2.0162 (13) |                         |             |
| O1—C3                  | 1.245 (2)   | 1.241 (2)   | 1.238 (2)   | 1.236 (2)   |                         |             |
| O2—C2                  | 1.2470 (19) | 1.2447 (19) | 1.2417 (19) | 1.240 (2)   |                         |             |
| O3—C3 <sup>ix</sup>    | 1.2641 (19) | 1.2645 (19) | 1.2660 (19) | 1.263 (2)   |                         |             |
| O4—C1                  | 1.235 (2)   | 1.236 (2)   | 1.235 (2)   | 1.231 (2)   |                         |             |
| O5—C2                  | 1.2618 (19) | 1.2624 (19) | 1.2631 (19) | 1.262 (2)   |                         |             |
| O6—C1                  | 1.2638 (19) | 1.2616 (19) | 1.2610 (19) | 1.260 (2)   |                         |             |
| C3—O3 <sup>ix</sup>    | 1.2641 (19) | 1.2645 (19) | 1.2659 (19) | 1.263 (2)   |                         |             |
| N11B—C10B              | 1.451 (7)   | 1.443 (7)   | 1.433 (7)   | 1.427 (8)   |                         |             |
| N11B—C10A              | 1.457 (7)   | 1.458 (7)   | 1.449 (7)   | 1.447 (8)   |                         |             |
| N1—C12 <sup>x</sup>    | 1.449 (6)   | 1.445 (6)   | 1.443 (6)   | 1.443 (7)   |                         |             |
| N1—C12                 | 1.449 (6)   | 1.445 (6)   | 1.443 (6)   | 1.443 (7)   |                         |             |

Symmetry code(s): (i)  $x-y+1/3, -y+2/3, -z+1/6$ ; (ii)  $x-y, x, -z$ ; (iii)  $-x+y, -x, z$ ; (iv)  $-x, -y, -z$ ; (v)  $-y, x-y, z$ ; (vi)  $y, -x+y, -z$ ; (vii)  $-x+y-1, -x, z$ ; (viii)  $-y, x-y+1, z$ ; (ix)  $-x, -y+1, -z$ ; (x)  $y-2/3, x+2/3, -z+1/6$ ; (xi)  $-y+1, -x+1, -z+1/2$ ; (xii)  $x, x-y+1, -z+1/2$ ; (xiii)  $-x+y, -x+1, z$ ; (xiv)  $-y+1, x-y+1, z$ ; (xv)  $-x+y, y, -z+1/2$ ; (xvi)  $-x, -y+2, -z$ ; (xvii)  $y-1, -x+y, -z$ ; (xviii)  $-y+1, x-y+2, z$ ; (xix)  $x-y+1, x+1, -z$ ; (xx)  $-x+y-1, -x+1, z$ .

Table 3. Selected hydrogen-bond parameters

| $D-H\cdots A$                        | $D-H$ (Å) | $H\cdots A$ (Å) | $D\cdots A$ (Å) | $D-H\cdots A$ (°) |
|--------------------------------------|-----------|-----------------|-----------------|-------------------|
| (100K)                               |           |                 |                 |                   |
| N11B—H11A $\cdots$ O1                | 0.89      | 2.35            | 3.079 (6)       | 138.6             |
| N11B—H11A $\cdots$ O2 <sup>i</sup>   | 0.89      | 2.35            | 3.101 (6)       | 141.5             |
| N11B—H11B $\cdots$ O2 <sup>ii</sup>  | 0.89      | 2.05            | 2.880 (6)       | 154.7             |
| C10B—H10D $\cdots$ O6 <sup>iii</sup> | 0.96      | 2.59            | 3.488 (6)       | 155.1             |
| C10B—H10F $\cdots$ O3 <sup>iv</sup>  | 0.96      | 2.55            | 3.390 (7)       | 145.6             |
| N1—H1A $\cdots$ O2 <sup>ii</sup>     | 0.89      | 2.13            | 2.927 (4)       | 149.1             |
| N1—H1B $\cdots$ O2 <sup>i</sup>      | 0.89      | 2.13            | 2.927 (4)       | 149.1             |
| (125K)                               |           |                 |                 |                   |
| N11B—H11A $\cdots$ O1                | 0.89      | 2.34            | 3.073 (6)       | 139.2             |
| N11B—H11A $\cdots$ O2 <sup>i</sup>   | 0.89      | 2.39            | 3.128 (6)       | 141.1             |
| N11B—H11B $\cdots$ O2 <sup>ii</sup>  | 0.89      | 2.06            | 2.891 (6)       | 155.7             |
| C10B—H10D $\cdots$ O6 <sup>iii</sup> | 0.96      | 2.58            | 3.484 (6)       | 157.6             |
| C10B—H10F $\cdots$ O3 <sup>iv</sup>  | 0.96      | 2.52            | 3.377 (7)       | 148.0             |
| N1—H1A $\cdots$ O2 <sup>ii</sup>     | 0.89      | 2.14            | 2.935 (4)       | 148.6             |
| N1—H1B $\cdots$ O2 <sup>i</sup>      | 0.89      | 2.14            | 2.935 (4)       | 148.6             |
| (140K)                               |           |                 |                 |                   |
| N11B—H11A $\cdots$ O1                | 0.89      | 2.33            | 3.072 (6)       | 140.5             |
| N11B—H11A $\cdots$ O2 <sup>i</sup>   | 0.89      | 2.42            | 3.150 (7)       | 139.8             |
| N11B—H11B $\cdots$ O2 <sup>ii</sup>  | 0.89      | 2.08            | 2.910 (6)       | 154.9             |
| C10B—H10D $\cdots$ O6 <sup>iii</sup> | 0.96      | 2.55            | 3.468 (7)       | 159.6             |
| C10B—H10F $\cdots$ O3 <sup>iv</sup>  | 0.96      | 2.52            | 3.395 (7)       | 151.1             |
| N1—H1A $\cdots$ O2 <sup>ii</sup>     | 0.89      | 2.14            | 2.941 (4)       | 149.3             |
| N1—H1B $\cdots$ O2 <sup>i</sup>      | 0.89      | 2.14            | 2.941 (4)       | 149.3             |
| (150K)                               |           |                 |                 |                   |
| N11B—H11A $\cdots$ O1                | 0.89      | 2.35            | 3.085 (8)       | 140.1             |
| N11B—H11A $\cdots$ O2 <sup>i</sup>   | 0.89      | 2.45            | 3.186 (8)       | 140.0             |
| N11B—H11B $\cdots$ O2 <sup>ii</sup>  | 0.89      | 2.09            | 2.930 (8)       | 156.0             |
| N1—H1A $\cdots$ O2 <sup>ii</sup>     | 0.89      | 2.15            | 2.952 (5)       | 149.1             |
| N1—H1B $\cdots$ O2 <sup>i</sup>      | 0.89      | 2.15            | 2.952 (5)       | 149.1             |
| (160K)                               |           |                 |                 |                   |
| N1—H1A $\cdots$ O1 <sup>v</sup>      | 0.89      | 2.43            | 3.174 (9)       | 141.7             |
| N1—H1A $\cdots$ O1 <sup>vi</sup>     | 0.89      | 2.54            | 3.241 (10)      | 135.6             |
| N1—H1B $\cdots$ O1 <sup>vii</sup>    | 0.89      | 2.15            | 2.982 (10)      | 155.8             |

Symmetry code(s): (i)  $x-y+1/3, -y+2/3, -z+1/6$ ; (ii)  $-y, x-y+1, z$ ; (iii)  $-x+y, -x+1, z$ ; (iv)  $-x, -y+1, -z$ ; (v)  $x-y+1, -y+1, z+1/2$ ; (vi)  $y, -x+y, -z+1$ ; (vii)  $-x, -y+1, -z+1$ ; (viii)  $x-y+1, x+1, -z+1$ .

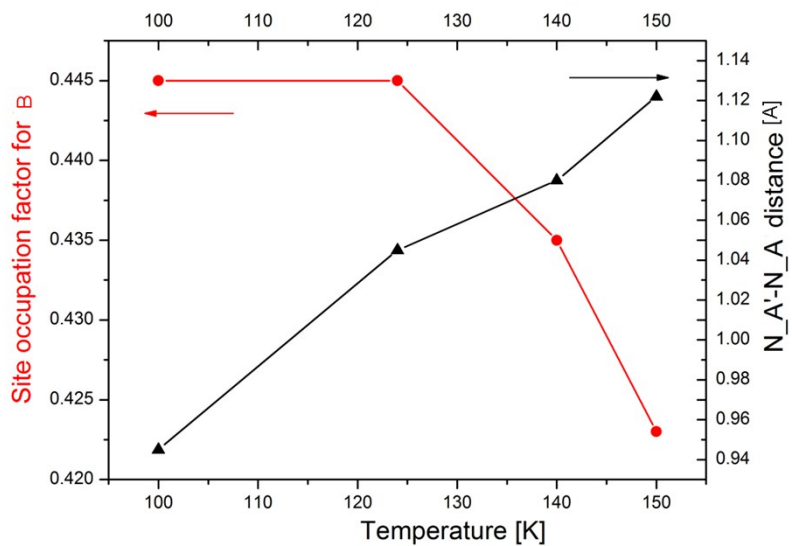

Figure S1. Temperature induced changes in the site occupation factor for B position and the distance between the split nitrogen atoms from A and A' states. The s.o.f for A and A' = (1-s.o.f.(B))/2.

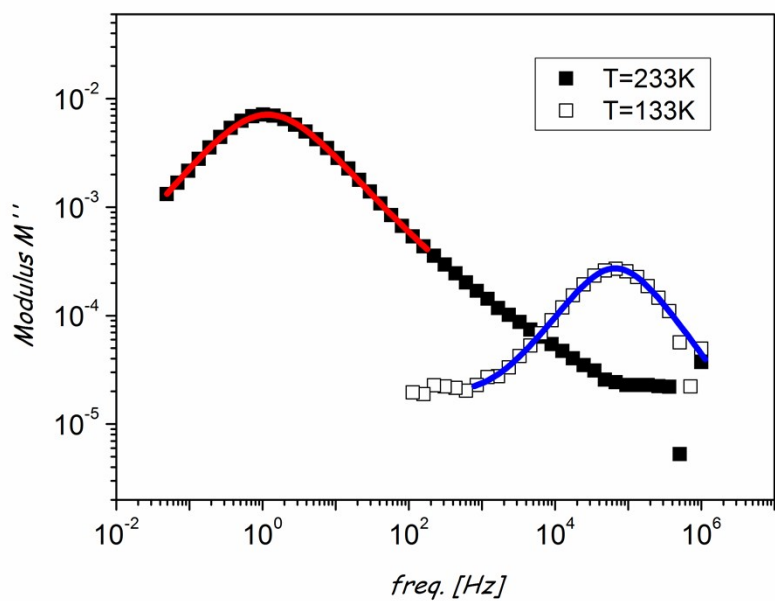

Figure S2: The exemplary fitting of relaxation time.
